# Supplementary material for: Polymorphonuclear Myeloid-Derived Suppressor Cell Accumulation as a Response to Cryptococcus neoformans Infection
Source: Preprints.org preprint supplement (doi:10.20944/preprints202407.2355.v1), 2024-07-30
Supplement: Supplementary file 1 [file supplementary]

**
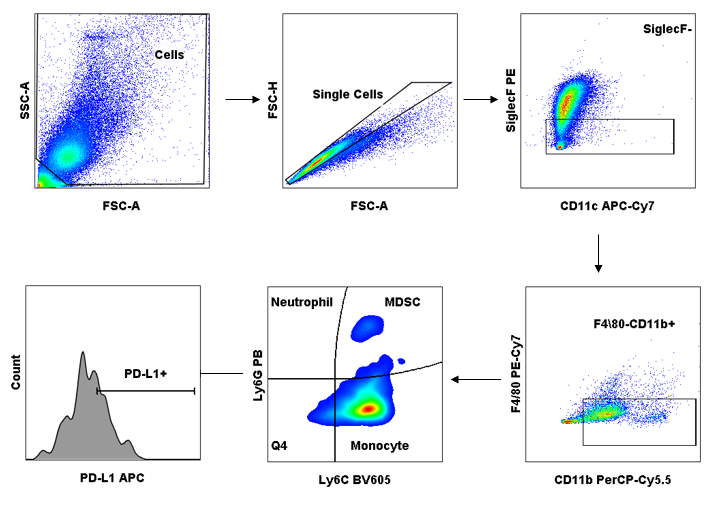
**

**Supplementary figure 1.** Gate strategy used for MDSCs cells in intratracheal infection. Bronchoaveolar lavage of mice was performed 48 hours or 21 days after infection with the B3501 or CAP67 strain of *C. neoformans*. The obtained cells were stained for flow cytometry to determine the frequency of CD11b+Ly6G+Ly6C+PD-L1+ cells within the gate of SiglecF-CD11c+ cells.

**
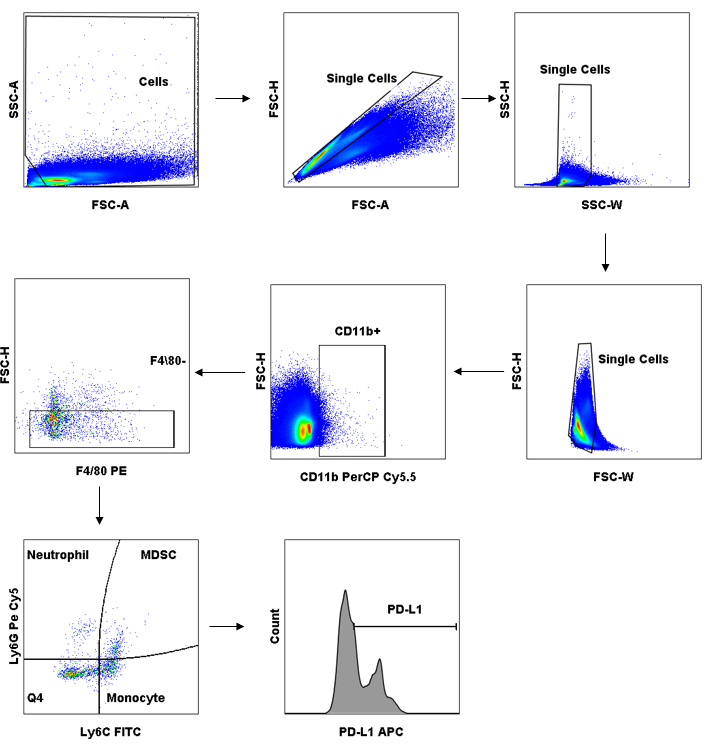
**

**Supplementary figure 2.** Gate strategy used for MDSCs cells in peritoneal infection. Peritoneal lavage of mice was performed 4 or 8 hours after infection with the B3501 or CAP67 strain of C. neoformans. The cells obtained were stained for flow cytometry to determine the frequency of CD11b+Ly6G+Ly6C+PD-L1+ cells within the gate of F4/80+ cells.
